# Supplementary material for: Neurofilaments as Emerging Biomarkers of Neuroaxonal Damage to Differentiate Behavioral Frontotemporal Dementia from Primary Psychiatric Disorders: A Systematic Review
Source: MDPI journal article supplement (doi:10.3390/diagnostics11050754), 2021-04-22
Supplement: s1 [file s1]

**Table S1.** Aggregated summary of literature review.

| References |                             | Number of Participants |       |     |         | Neurofilament (pg/mL) |      |      |     | Age      |      |      |    | Diagnostic Subgroups |    |           |    |       |       |      |       |       |      |     |       |       |        |  |  |
|------------|-----------------------------|------------------------|-------|-----|---------|-----------------------|------|------|-----|----------|------|------|----|----------------------|----|-----------|----|-------|-------|------|-------|-------|------|-----|-------|-------|--------|--|--|
|            |                             |                        |       |     |         | FTD                   |      | PPD  |     | Controls |      | FTD  |    | PPD                  |    | Contrôles |    | FTD   |       |      |       |       |      | PPD |       |       |        |  |  |
|            |                             | Total                  | bvFTD | PPD | Control | Mean                  | SD   | Mean | SD  | Mean     | SD   | Mean | SD | Mean                 | SD | Mean      | SD | Poss. | Prob. | Def. | bvFTD | Other | Depr | BP  | Schiz | Anxie | Others |  |  |
| CSF        | Vivjverberg et al. (2017)   | 47                     | 22    | 25  |         | 9660                  | 6739 | 857  | 299 |          |      | 63   | 6  | 61                   | 7  |           |    | 0     | 19    | 3    | 0     |       | 11   | 4   | 0     | 1     | 9      |  |  |
|            | Rolstad et al. (2015)       | 153                    |       | 82  | 71      |                       |      | 486  | 426 | 254      | 55   |      |    | 38                   | 15 | 38        | 13 |       |       |      |       |       | 0    | 82  | 0     | 0     | 0      |  |  |
|            | Isgren et al. (2017)        | 77                     |       | 77  |         |                       |      | 395  | 826 |          |      |      |    | 40                   | 17 |           |    |       |       |      |       |       | 0    | 77  | 0     | 0     | 0      |  |  |
|            | Jakobsson et al. (2015)     | 219                    |       | 133 | 86      |                       |      | 480  | 288 | 359      | 315  |      |    | 36                   | 13 | 38        | 17 |       |       |      |       |       | 0    | 133 | 0     | 0     | 0      |  |  |
|            | Fourier et al. (2020)       | 114                    | 50    | 64  |         | 4442                  | 3427 | 1199 | 745 |          |      | 60   | 11 | 64                   | 15 |           |    | 0     | 0     | 17   | 33    |       | 36   | 8   | 3     | 12    | 5      |  |  |
|            | Eratne et al. (2019)        | 52                     |       | 31  | 21      |                       |      | 949  | 379 | 1036     | 282  |      |    | 66                   | 3  | 51        | 9  |       |       |      |       |       | 9    | 9   | 9     | 1     | 3      |  |  |
|            | Scherling et al. (2014)     | 92                     | 45    |     | 47      | 5225                  | 4753 |      |     | 1164     | 627  | 65   | 8  |                      |    | 66        | 11 | 0     | 0     | 0    | 45    |       |      |     |       |       |        |  |  |
|            | Magdalinou et al. (2015)    | 46                     | 16    |     | 30      | 1428                  | 981  |      |     | 619      | 319  | 63   | 9  |                      |    | 60        | 6  | 0     | 0     | 0    | 16    |       |      |     |       |       |        |  |  |
|            | Gaiani et al. (2017)        | 64                     | 20    |     | 44      | 2337                  | 1321 |      |     | 507      | 371  | 65   | 8  |                      |    | 54        | 24 | 0     | 0     | 0    | 20    |       |      |     |       |       |        |  |  |
|            | Alcolea et al. (2017)       | 144                    | 68    |     | 76      | 2174                  | 2395 |      |     | 461      | 220  | 67   | 9  |                      |    | 60        | 8  | 0     | 0     | 0    | 68    |       |      |     |       |       |        |  |  |
|            | Lista et al. (2017)         | 30                     | 9     |     | 21      | 1050                  | 649  |      |     | 633      | 204  | 73   | 3  |                      |    | 64        | 7  | 0     | 0     | 0    | 9     |       |      |     |       |       |        |  |  |
|            | Abu-Rumeileh et al. (2018a) | 90                     | 52    |     | 38      | 4587                  | 5344 |      |     | 1283     | 649  | 65   | 10 |                      |    | 63        | 8  | 0     | 0     | 0    | 52    |       |      |     |       |       |        |  |  |
|            | Ljubenkov et al. (2018)     | 89                     | 40    |     | 49      | 5610                  | 4800 |      |     | 1300     | 610  | 63   | 8  |                      |    | 64        | 8  | 0     | 0     | 0    | 40    |       |      |     |       |       |        |  |  |
|            | Goosens et al. (2018)       | 66                     | 46    |     | 20      | 4557                  | 3514 |      |     | 1889     | 2742 | 64   | 12 |                      |    | 69        | 10 | 0     | 0     | 0    | 30    | 6     |      |     |       |       |        |  |  |
|            | Wilke et al. (2016)         | 87                     | 41    |     | 46      | 2495                  | 1081 |      |     | 1044     | 457  | 68   | 11 |                      |    | 66        | 11 | 0     | 0     | 0    | 41    |       |      |     |       |       |        |  |  |
|            | Abu-Rumeileh et al. (2018b) | 57                     | 19    |     | 38      | 5846                  | 8002 |      |     | 1172     | 569  | 63   | 9  |                      |    | 64        | 11 | 0     | 0     | 0    | 19    |       |      |     |       |       |        |  |  |

| Table 1. The number of studies, patients, and events in the included studies |                               |          |          |        |         |          |        |         |          |        |         |              |        |         |          |        |         |          |        |    |    |    |    |    |   |   |
|------------------------------------------------------------------------------|-------------------------------|----------|----------|--------|---------|----------|--------|---------|----------|--------|---------|--------------|--------|---------|----------|--------|---------|----------|--------|----|----|----|----|----|---|---|
| Study                                                                        | Year                          | COVID-19 |          |        |         |          |        |         |          |        |         | Non-COVID-19 |        |         |          |        |         |          |        |    |    |    |    |    |   |   |
|                                                                              |                               | Studies  | Patients | Events | Studies | Patients | Events | Studies | Patients | Events | Studies | Patients     | Events | Studies | Patients | Events | Studies | Patients | Events |    |    |    |    |    |   |   |
| BLOOD                                                                        | Meeter et al. (2018)          | 224      | 179      |        | 45      | 3246     | 2291   |         | 982      | 567    | 63      | 8            |        | 60      | 9        | 0      | 0       | 0        | 179    |    |    |    |    |    |   |   |
|                                                                              | Paterson et al. (2018)        | 75       | 45       |        | 30      | 1988     | 1910   |         | 671      | 260    | 62      | 7            |        | 64      | 13       | 0      | 0       | 4        | 41     |    |    |    |    |    |   |   |
|                                                                              | Hampel et al. (2018)          | 30       | 9        |        | 21      | 1050     | 649    |         | 633      | 204    | 72      | 3            |        | 64      | 8        | 0      | 0       | 0        | 9      |    |    |    |    |    |   |   |
|                                                                              | Niikado et al. (2019)         | 24       | 13       |        | 11      | 2610     | 1685   |         | 657      | 287    | 59      | 6            |        | 64      | 6        | 0      | 0       | 0        | 13     |    |    |    |    |    |   |   |
|                                                                              | Steinacker et al. (2018)      | 37       | 37       |        |         | 2948     | 2630   |         |          |        | 64      | 9            |        |         |          | 15     | 17      | 5        | 0      |    |    |    |    |    |   |   |
|                                                                              | Abu-Rumeileh et al. (2020)    | 58       | 30       |        | 28      | 3111     | 3560   |         | 891      | 264    | 67      | 8            |        | 65      | 10       | 0      | 0       | 22       | 0      | 7  |    |    |    |    |   |   |
|                                                                              | Antonell et al. (2020)        | 100      | 50       |        | 50      | 2617     | 1854   |         | 406      | 137    | 62      | 9            |        | 57      | 13       | 0      | 0       | 0        | 40     | 8  |    |    |    |    |   |   |
| SEROLOGY                                                                     | Besse et al. (2019)           | 30       |          | 15     | 15      |          | 17     | 12      | 16       | 0      |         | 49           | 14     | 49      | 14       |        |         |          | 0      | 15 | 0  | 0  | 0  |    |   |   |
|                                                                              | Rami Al Shweiki et al. (2019) | 97       | 20       | 50     | 27      | 64       | 49     | 17      | 7        | 15     | 6       | 49           | 6      | 52      | 9        | 47     | 12      | 9        | 5      | 6  | 0  | 28 | 11 | 11 | 0 | 0 |
|                                                                              | Katisko et al. (2020)         | 100      | 66       | 34     |         | 37       | 33     | 16      | 10       |        | 64      | 9            | 56     | 9       |          | 0      | 66      | 0        | 0      |    | 19 | 8  | 7  | 0  | 0 |   |
|                                                                              | Wilke et al. (2016)           | 87       | 41       |        | 46      | 50       | 38     |         | 19       | 18     | 68      | 11           |        | 64      | 11       | 0      | 0       | 0        | 0      | 41 |    |    |    |    |   |   |
|                                                                              | Rohrer et al. (2016)          | 62       | 34       |        | 28      | 58       | 33     |         | 20       | 8      | 63      | 8            |        | 64      | 7        | 0      | 0       | 0        | 0      | 34 |    |    |    |    |   |   |
|                                                                              | Verde et al. (2019)           | 62       | 12       |        | 50      | 56       | 70     |         | 34       | 57     | 64      | 23           |        | 60      | 34       | 0      | 0       | 2        | 10     |    |    |    |    |    |   |   |
|                                                                              | Steinacker et al. (2018)      | 89       | 74       |        | 15      | 49       | 35     |         | 22       | 21     | 64      | 9            |        | 65      | 11       | 15     | 17      | 5        | 0      |    |    |    |    |    |   |   |
|                                                                              | van der Ende et al. (2019)    | 186      | 59       |        | 127     | 48       | 34     |         | 8        | 4      | 63      | 8            |        | 49      | 15       | 0      | 0       | 59       | 0      | 17 |    |    |    |    |   |   |
|                                                                              | Vivjverberg et al. (2017)     | 47       | 22       | 25     |         | 9660     | 6739   | 857     | 299      |        | 63      | 6            | 61     | 7       |          | 0      | 19      | 3        | 0      |    | 11 | 4  | 0  | 1  | 9 |   |
